# Supplementary material for: Investigation of the transcriptomic and metabolic changes associated with superficial scald physiology impaired by lovastatin and 1-methylcyclopropene in pear fruit (cv. “Blanquilla”)
Source: PubMed Central journal article supplement (PMC7109095; doi:10.1038/s41438-020-0272-x), 2020-04-01
Supplement: 41438_2020_272_MOESM3_ESM.pdf [file 41438_2020_272_MOESM3_ESM.pdf]

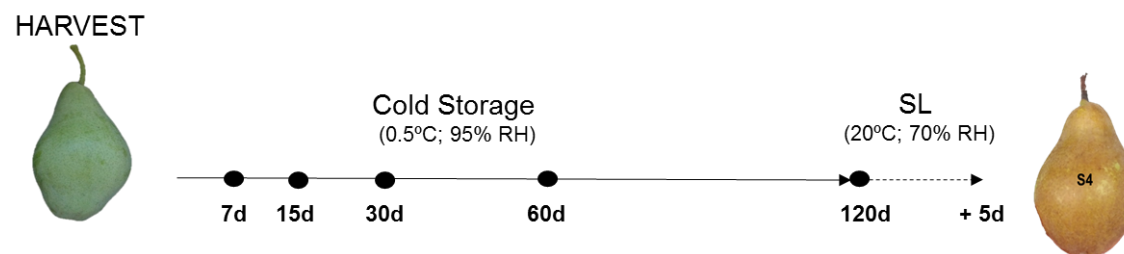

| MEASUREMENT                                                                                    | DESCRIPTION                  |                            |           |           |           |           |           |           |  |
|------------------------------------------------------------------------------------------------|------------------------------|----------------------------|-----------|-----------|-----------|-----------|-----------|-----------|--|
| Superficial scald evaluations                                                                  |                              |                            |           |           |           |           | 90*       |           |  |
| Instrumental quality                                                                           |                              | 30                         |           |           |           |           | 30        | 90*       |  |
| Metabolic and molecular analysis                                                               | 3 reps of 10 f (snap frozen) |                            |           |           |           |           |           |           |  |
| α-farnesene and CTols                                                                          | 3 reps of 5 f                |                            | 15        | 15        | 15        | 15        |           |           |  |
| Ethylene measurements                                                                          | 4 reps of 2 f                | 8                          |           |           |           | 8         | 8         |           |  |
| <b>Total n° fruit per out-turn</b>                                                             |                              | <b>38</b>                  | <b>15</b> | <b>15</b> | <b>15</b> | <b>23</b> | <b>38</b> | <b>90</b> |  |
| *Same fruit used for superficial scald evaluation after 4 months of cold storage and after SL. |                              | <b>196 f per treatment</b> |           |           |           |           |           |           |  |

**Figure S3:** Experimental design depicting the different samplings as well as the number of fruit used for each of the different measurements.
